# Supplementary material for: Knockout of Arabidopsis thaliana VEP1, Encoding a PRISE (Progesterone 5β-Reductase/Iridoid Synthase-Like Enzyme), Leads to Metabolic Changes in Response to Exogenous Methyl Vinyl Ketone (MVK)
Source: MDPI journal article supplement (doi:10.3390/metabo12010011), 2021-12-23
Supplement: s1 [file s1]

# Knockout of *Arabidopsis thaliana* VEP1, Encoding a PRISE (Progesterone 5 $\beta$ -Reductase/Iridoid Synthase-Like Enzyme), Leads to Metabolic Changes in Response to Exogenous Methyl Vinyl Ketone (MVK)

Jan Klein <sup>1</sup>, Mona Ernst <sup>2</sup>, Alexander Christmann <sup>3</sup>, Marina Tropper <sup>2</sup>, Tim Leykauf <sup>2</sup>, Wolfgang Kreis <sup>2</sup> and Jennifer Munkert <sup>2,\*</sup>

- <sup>1</sup> Department of Plant Physiology, Matthias-Schleiden-Institute for Genetics, Bioinformatics and Molecular Botany, University of Jena, 07743 Jena, Germany; jan.klein@uni-jena.de
- <sup>2</sup> Department of Biology, University of Erlangen-Nuremberg, 91058 Erlangen, Germany; mona.ernst@gmx.de (M.E.); marina.tropper@fau.de (M.T.); tim.leykauf@fau.de (T.L.); wolfgang.kreis@fau.de (W.K.)
- <sup>3</sup> Chair of Botany, TUM School of Life Sciences Weihenstephan, Technical University of Munich, 85354 Freising, Germany; alexander.christmann@tum.de
- \* Correspondence: jennifer.munkert@fau.de; Tel.: +49-91318528251

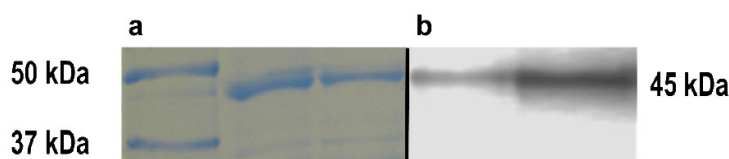

**Figure S1.** Heterologous expression of CDS of *AtStR2* in pDEST17 vector in *E. coli*. (a) SDS-Page analysis of recombinant *AtStR2*. Purified *rAtStR2* protein has a size of about 43 kDa and was visualized with Coomassie-Brilliant-Blue R 250; (b) Immunoblot analysis of *rAtStR2* using anti-His antibodies (primary) and anti-mouse IgG-peroxidase antibodies (secondary). Chemiluminescence was used for detection.

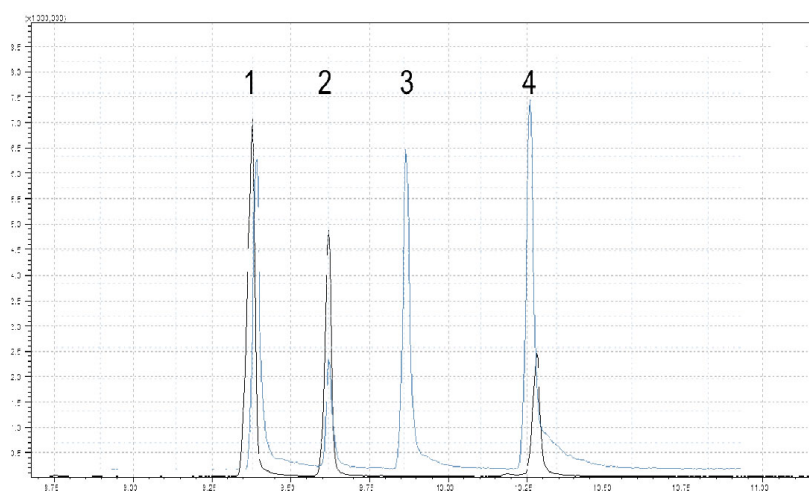

**Figure S2.** Enantioselective conversion of progesterone by *rAtSt5 $\beta$ R2*. Steroid mixture (blue) including testosterone (1;  $t_{R1}$  = 9.3 min), 5 $\beta$ -pregnane-3,20-dione (2;  $t_{R1}$  = 9.6 min), 5 $\alpha$ -pregnane-3,20-dione (3;  $t_{R1}$  = 9.9 min) and progesterone (4;  $t_{R1}$  = 10.3 min) by the GC-MS method used to determine product specificity of *rAtStR2* (black).

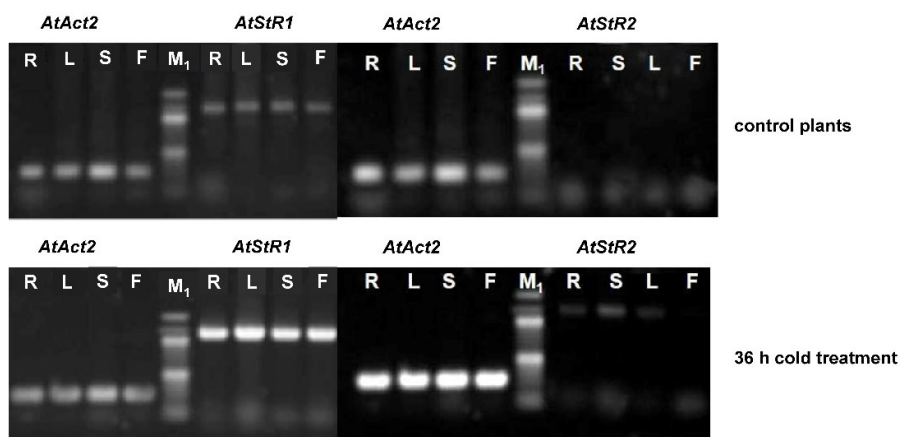

**Figure S3.** Expression of *AtStR1* and *AtStR2* in normal condition and after cold shock treatment. M<sub>1</sub> = 100 bp marker; Expression of *AtAct2*, *AtStR1* and *AtStR2* in roots (R), leaves (L), stem (S) and flowers (F) of *Arabidopsis thaliana* in control plants and after 36 h cold treatment.

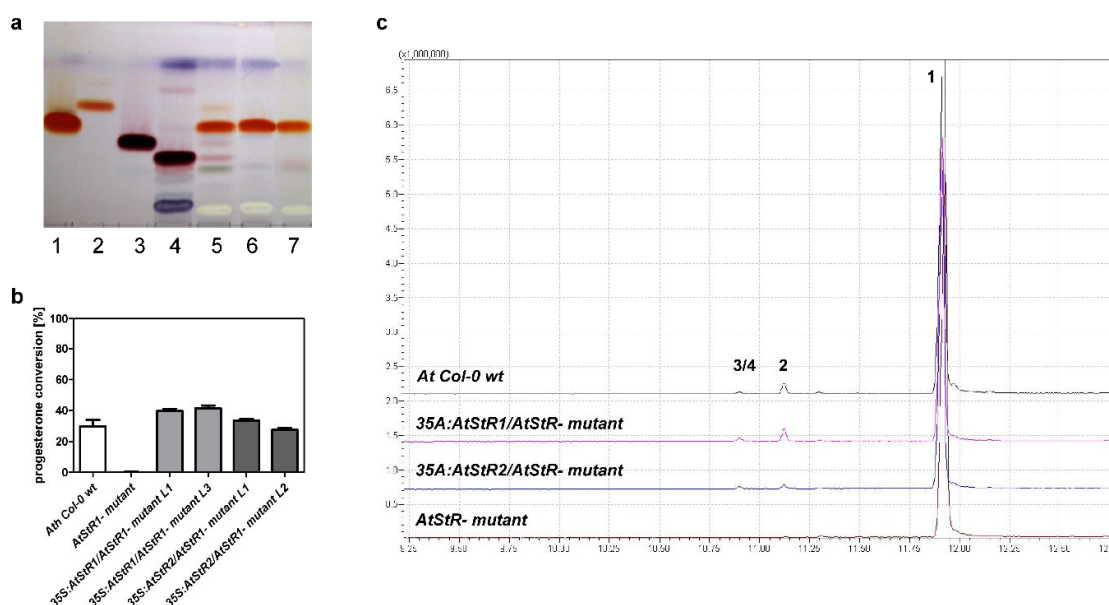

**Figure S4.** *AtStR* protein activity in plant leaf extracts of *Ath Col-0* wt plants (5), *AtStR*- (6), *35S:AtStR1/AtStR1*- and in *35S:AtStR2/AtStR1*- mutant lines. (a) Thin-layer chromatography analysis of standard compounds: (1) progesterone (R<sub>f</sub> = 0.5), (2) 5β-pregnane-3,20-dione (R<sub>f</sub> = 0.6), (3) 5β-pregnan-3β-ol-20-one (R<sub>f</sub> = 0.4), (4) 5β-pregnan-3α-ol-20-one (R<sub>f</sub> = 0.3), *AtStR* protein activity in plant leaf extracts of *Ath Col-0* wt plants (5) and (6) *AtStR*- mutant, (8) heat inactivated control assay; (b) quantification of converted progesterone [%] in wt and mutant lines; (c) GC-MS analysis of protein assays from wt and mutant lines. (1) progesterone, (2) 5β-pregnane-3,20-dione, (3) 5β-pregnan-3β-ol-20-one, (4) 5β-pregnan-3α-ol-20-one.

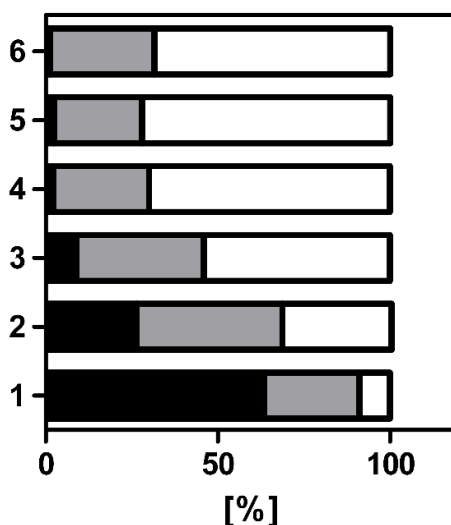

**Figure S5.** Vein patterning in cotyledons in *Ath* Col-0 wt plants, *AtStR*-, *35S:AtStR1/AtStR1*- and in *35S:AtStR2/AtStR1*- mutant lines. Vein patterning is analyzed in % regarding intact and normal structure with distal and proximal areoles closed (black), aberrant vein patterning structure (grey) or aberrant structure in pairs (white). (1) *Ath* Col-0 wt, (2) *AtStR1*-, (3) *35S:AtStR1/AtStR1-1*, (4) *35S:AtStR1/AtStR1-2*, (5) *35S:AtStR2/AtStR1-1*, (6) *35S:AtStR2/AtStR1-2*.

**Table S1.** List of primer used in qPCR.

| Name                     | Oligonucleotide             | Annealing Temperature | Locus     |
|--------------------------|-----------------------------|-----------------------|-----------|
| JK_qAtAct_for:           | 5'TCAGATGCCCAGAAAGTCTTGTT'3 | 57°C                  | At3g18780 |
| JK_qAtAct_rev:           | 5'GAGATCCACATCTGCTGGAATG'3  |                       |           |
| JK_qAtEF1 $\alpha$ _for: | 5'GTACGTCGCATCCAACCTCCA'3   | 57°C                  | At1g18070 |
| JK_qAtEF1 $\alpha$ _rev: | 5'CACAGCGAAACGTCCAAGTG'3    |                       |           |
| JK_qAtStR1_for:          | 5'CTCCCTCTTCCGACACACC'3     | 60° C                 | At4g24220 |
| JK_qAtStR1_rev:          | 5'GTCAACGTTGGTGAAAGGGC'3    |                       |           |
| JK_qAtStR2_for:          | 5'CAATGGCTCGTGGAGAAGGT'3    | 60° C                 | At5g58750 |
| JK_qAtStR2_rev:          | 5'TTCCGGCCAAATCTCCTTCC'3    |                       |           |
| JK_qAtPR4_for:           | 5'TCAGATGCCCAGAAAGTCTTGTT'3 | 57°C                  | At3g04720 |
| JK_qAtPR4_rev:           | 5'GAGATCCACATCTGCTGGAATG'3  |                       |           |
| JK_qAtGR1_for:           | 5'CGTGGAATGGGTGCTACTGT'3    | 60° C                 | At3g24170 |
| JK_qAtGR1_rev:           | 5'TCGTCAACCTTCACAGCTCC'3    |                       |           |
| JK_AtPIN1_for:           | 5'AGGGATGTTTTCGCCCAACA'3    | 57° C                 | At1g73590 |
| JK_AtPIN1_rev:           | 5'ACCGTCCGTTGCCAATACTT'3    |                       |           |
| JK_AtAER_for:            | 5'CACCACCGTCGAACTTAGGG'3    | 60° C                 | At5g16970 |
| JK_AtAER_rev:            | 5'ATGCGCGTGAGTCATTGGA'3     |                       |           |
| JK_qAtAOR_for            | 5'AACAACCACCGCCACAAC'3      | 57 °C                 | At1g23740 |
| JK_qAtAOR_rev            | 5'TCAGAACATCAACTCCGCCG'3    |                       |           |

**Table S2.** List of primer used in cold treatment experiment.

| Name           | Oligonucleotide               | Product Length | Locus     |
|----------------|-------------------------------|----------------|-----------|
| ME_qAtAct_for: | 5'GGAGATCCACATCTGCTGGAATGT'3  | 312 bp         | At3g18780 |
| ME_qAtAct_rev: | 5'ATTCAGGATGCCCAGAAGTCTTGTT'3 |                |           |
| ME_AtStR1_for: | 5'CACCATGAGTTGGTGGTGGCTG'3    | 1167 bp        | At4g24220 |
| ME_AtStR1_rev: | 5' TCAAGGTACGATCTTGAACGCCTT'3 |                |           |
| ME_AtStR2_for: | 5' ATGGGGTCTGAAAATGGCAG'3     | 1161 bp        | At5g58750 |
| ME_AtStR2_rev: | 5'TTACAAAGGAATGAGTTTTTCATCT'3 |                |           |
